# Supplementary material for: Fluorescent behaviour in host–guest interactions. Part 3.For Part 2, see ref. 13. Fluorescent sensing for organic guests using three types of amino-β-cyclodextrinsElectronic supplementary information (ESI) available: Figs. S1–S3. See http://www.rsc.org/suppdata/p2/b1/b108204n/
Source: Royal Society of Chemistry journal article supplement (doi:10.1039/b108204n), 2002-01-17
Supplement: b108204n.doc [file b108204n.doc]

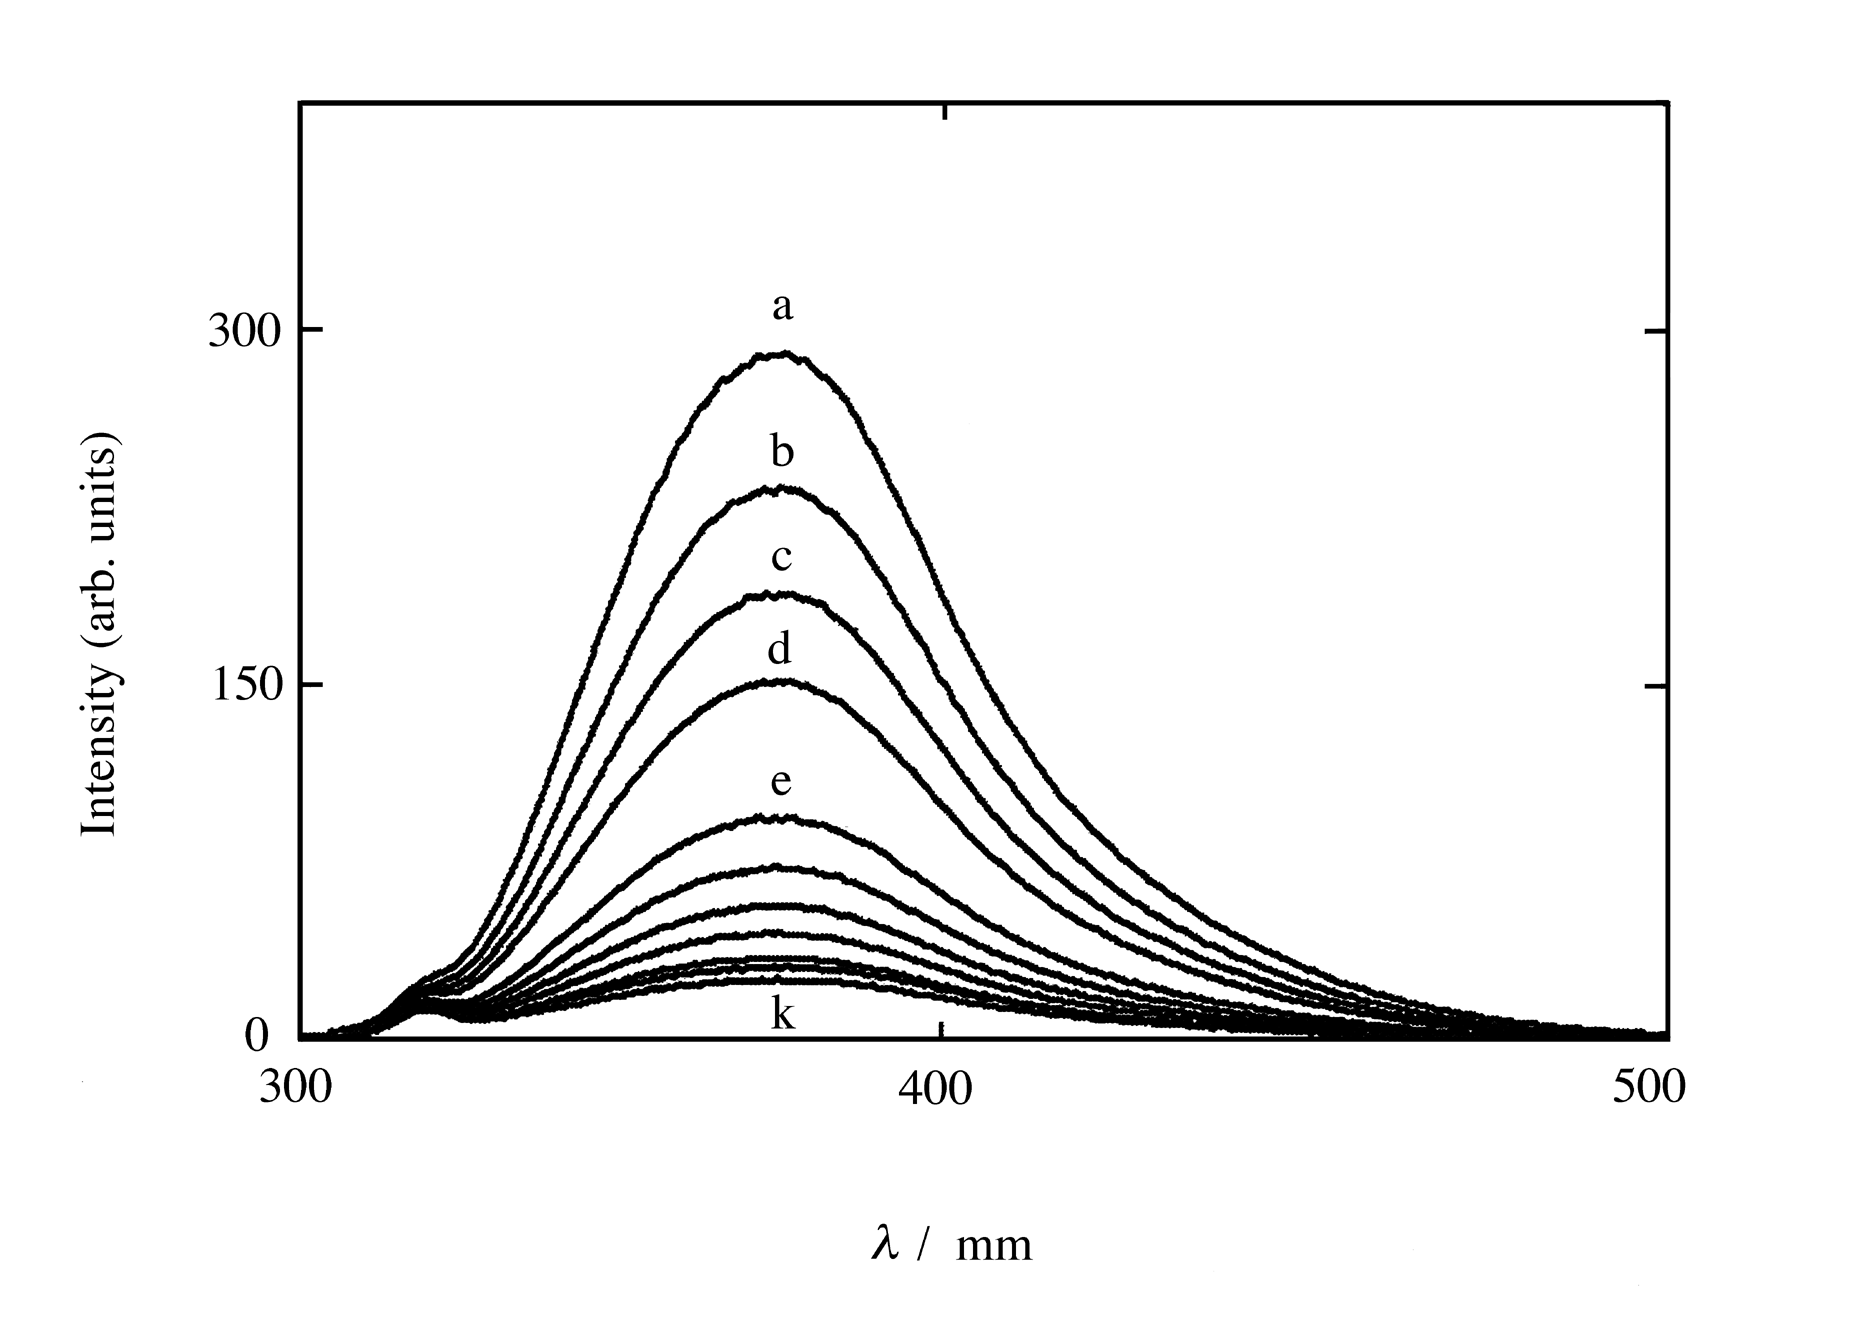


**Fig. S1** Temperature-dependent fluorescent spectrum of **1**: [**1**]= 1.25 x 10-5 mol dm-3 and p*H* = 7.0. The excitation (**ex = 295 nm) and emission bandwidth were set at 5.0 and 3.0 nm: 25 (a); 30 (b); 35 (c); 40 (d); 80 (e) oC.


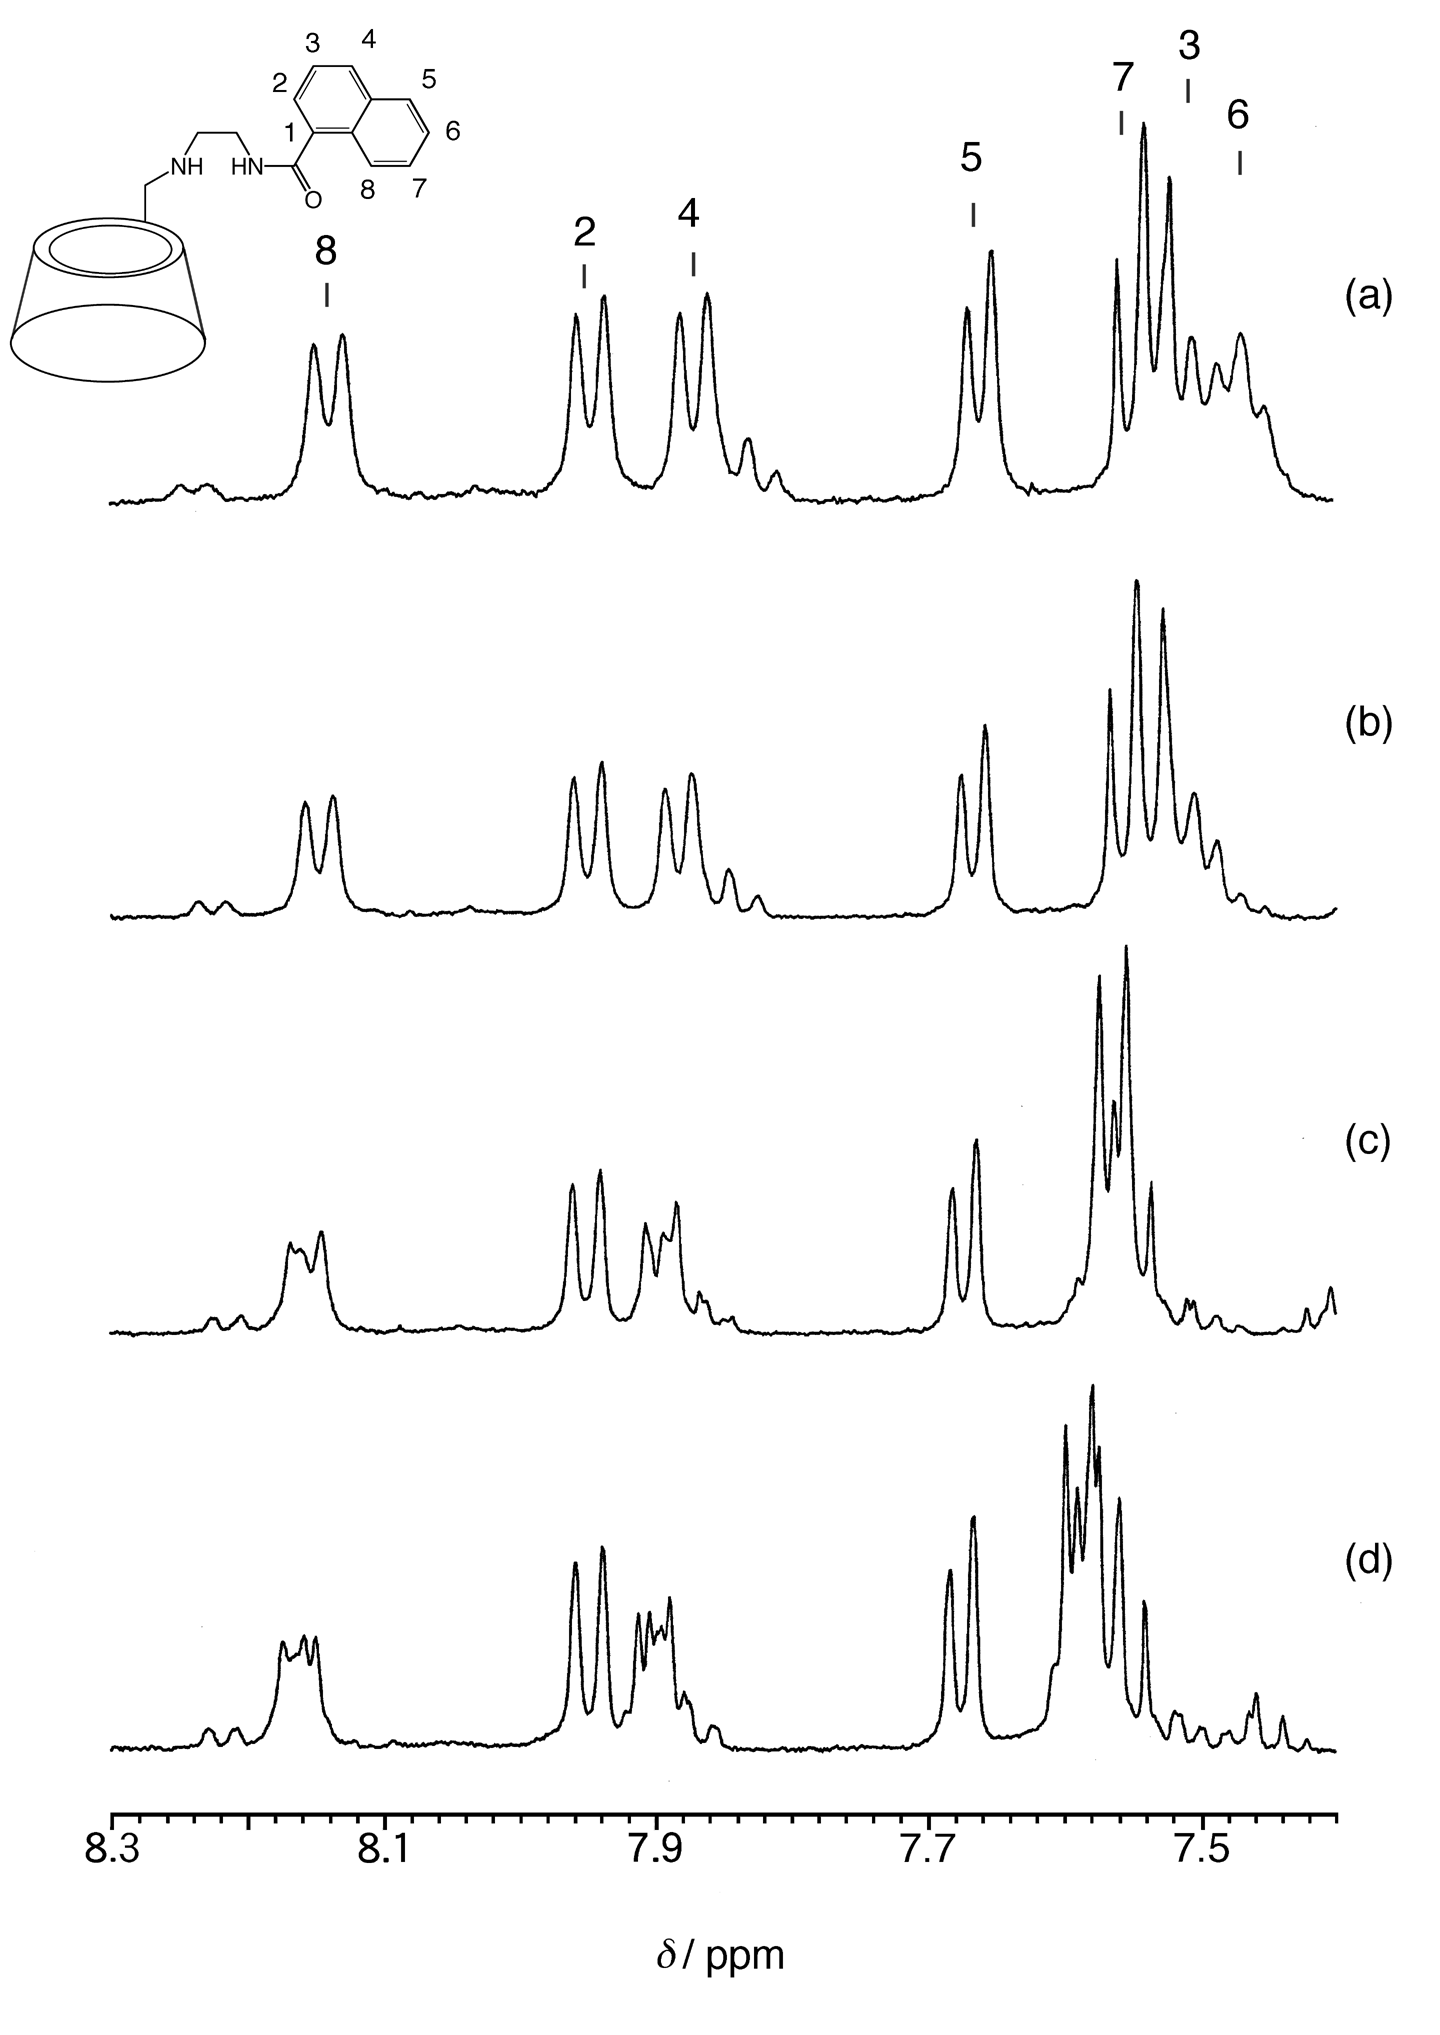


**Fig. S2** 1H NMR spectra of **1** at various temperature in D2O. Aromatic regions for **1** are shown: 10 (a); 20 (b); 40 (c); 60 (d) oC.


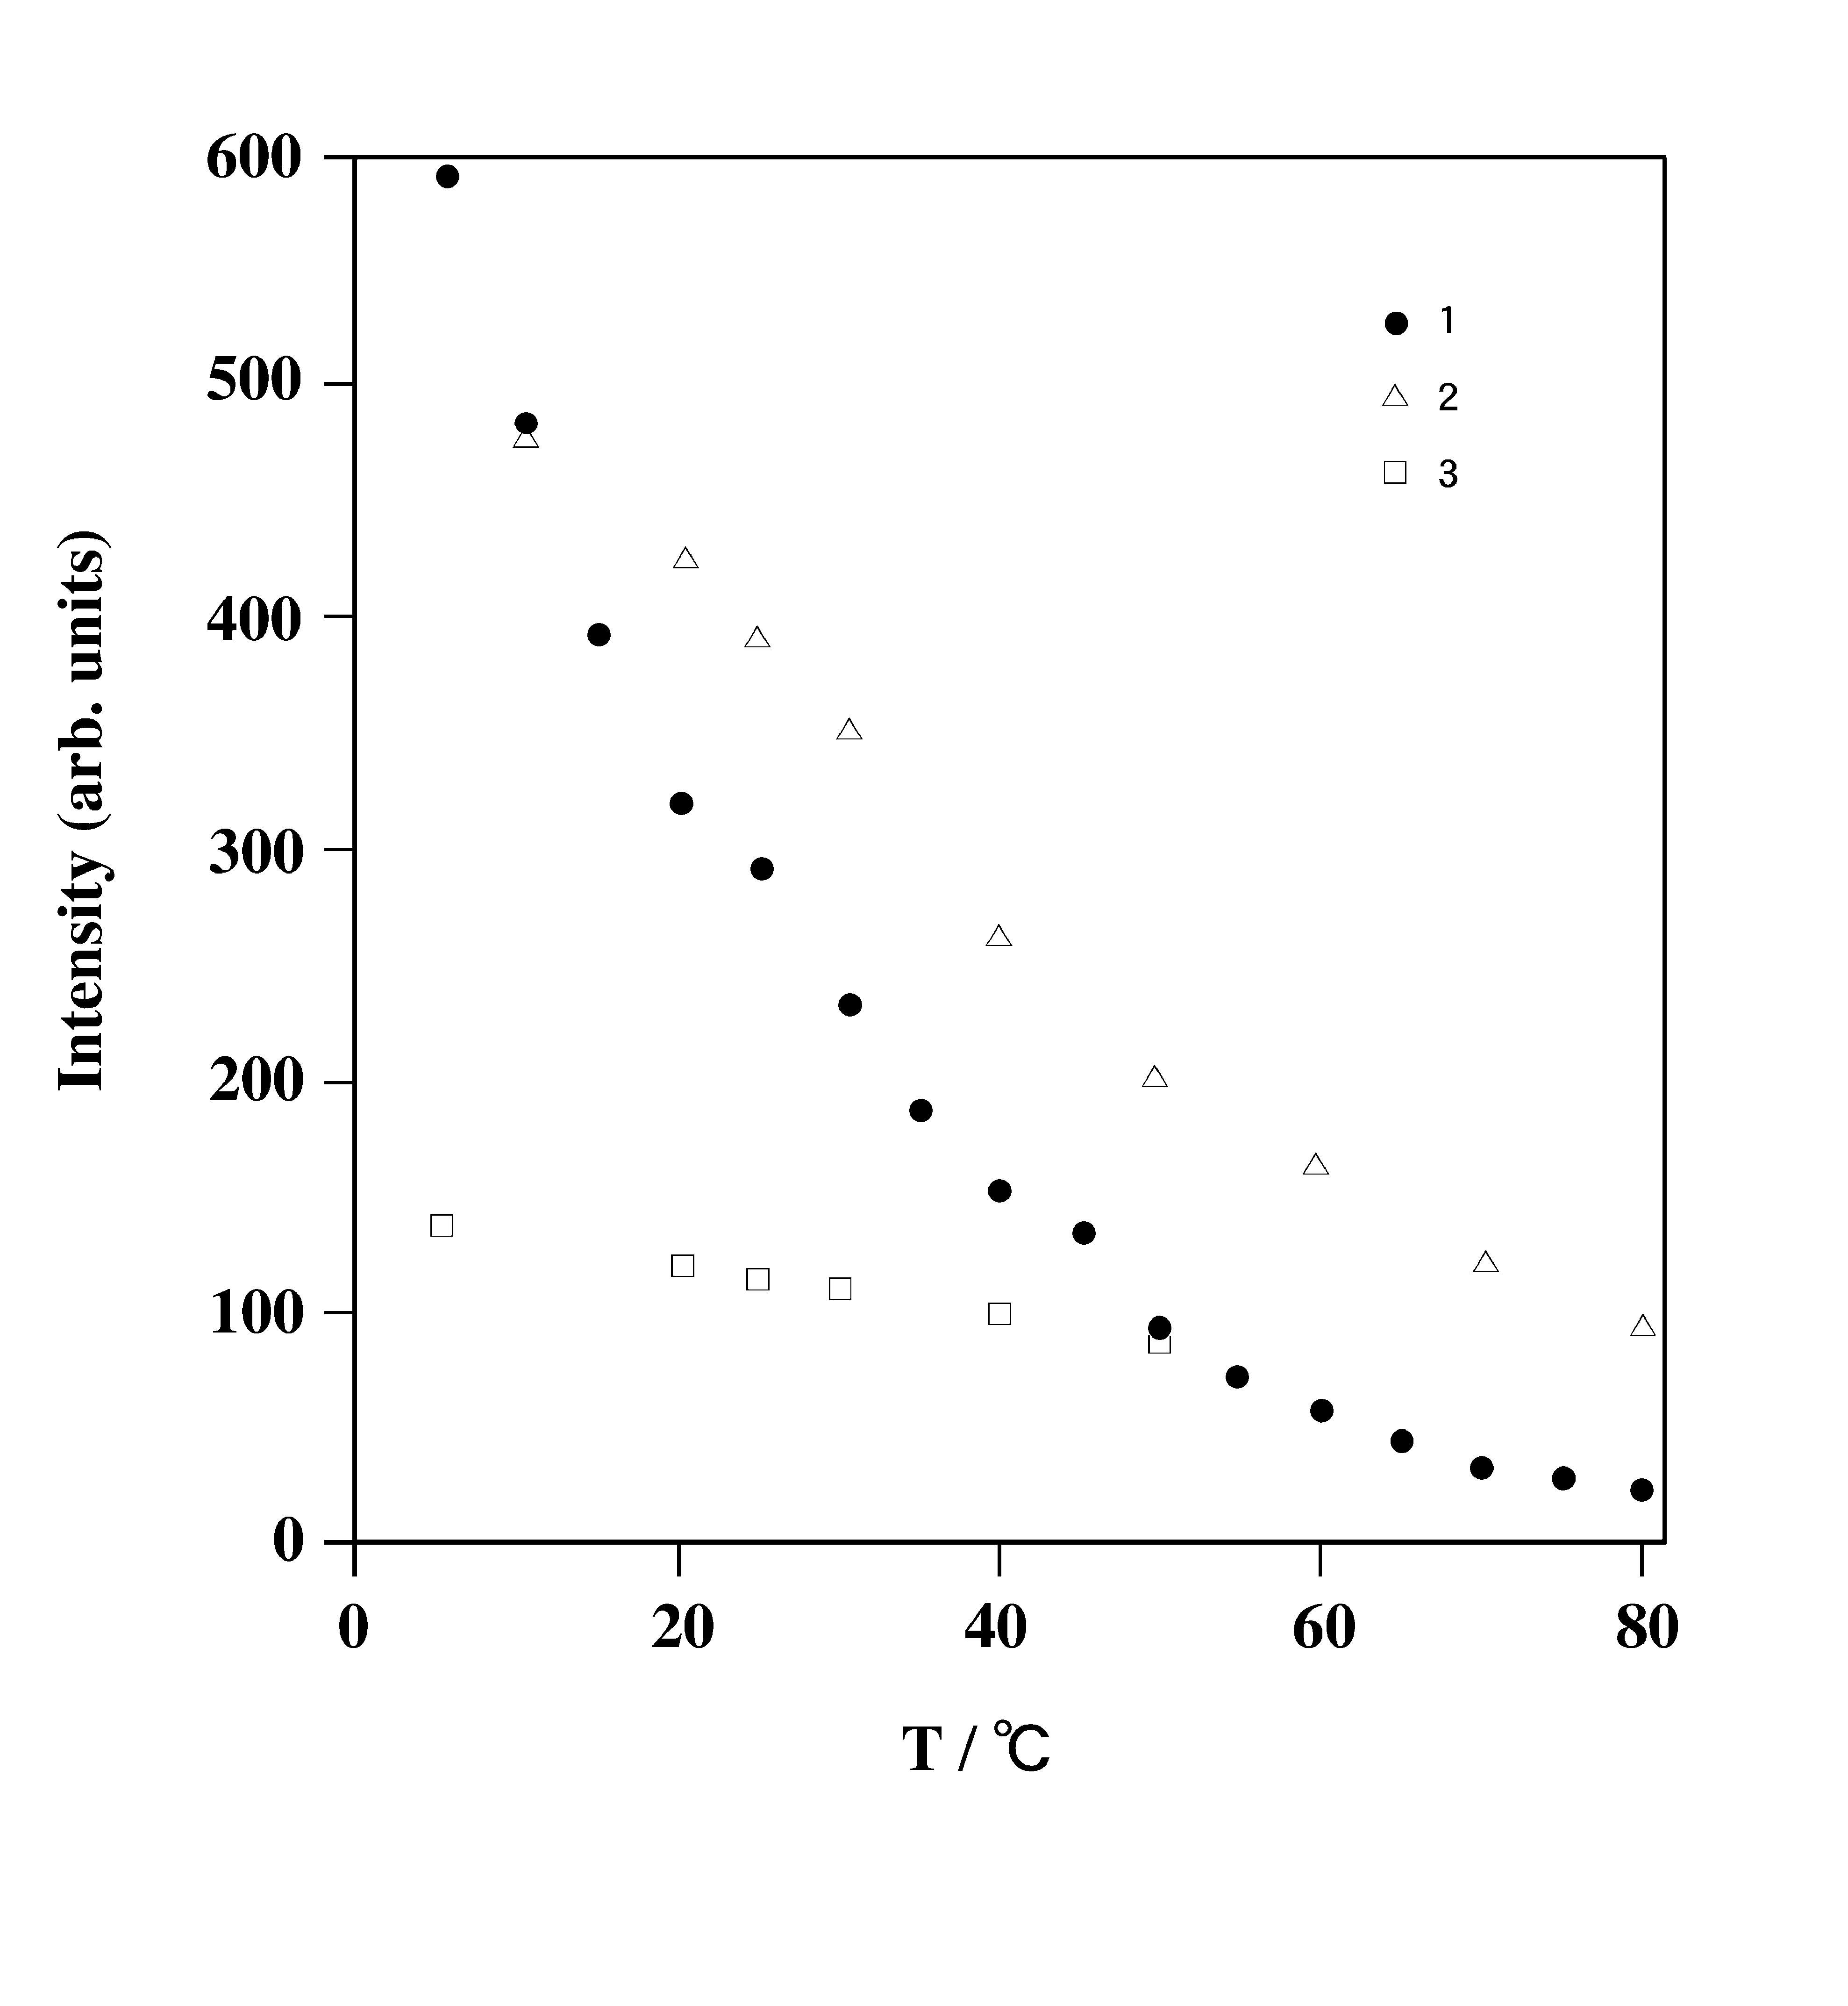


**Fig. S3** Plots of fluorescence intensity at **em(max) *vs*. temperature for **1**, **2** and **3** at p*H* = 7.0. [**1**] = [**2**] = [**3**] = 1.25 x 10-5 mol dm-3.
